# Supplementary material for: Novel point-of-care cytokine biomarker lateral flow test for the screening for sexually transmitted infections and bacterial vaginosis: study protocol of a multicentre multidisciplinary prospective observational clinical study to evaluate the performance and feasibility of the Genital InFlammation Test (GIFT)
Source: PubMed Central journal article supplement — BMJ Open. 2024 May 1;14(5):e084918. doi: 10.1136/bmjopen-2024-084918 (PMC11086546; doi:10.1136/bmjopen-2024-084918), 2024-05-01
Supplement: bmjopen-2024-084918.reviewer_comments.pdf [file bmjopen-2024-084918.reviewer_comments.pdf]

## PEER REVIEW HISTORY

BMJ Open publishes all reviews undertaken for accepted manuscripts. Reviewers are asked to complete a checklist review form (<http://bmjopen.bmj.com/site/about/resources/checklist.pdf>) and are provided with free text boxes to elaborate on their assessment. These free text comments are reproduced below.

## ARTICLE DETAILS

|                            |                                                                                                                                                                                                                                                                                                                                                                                                                                                                                                                                                                                                 |
|----------------------------|-------------------------------------------------------------------------------------------------------------------------------------------------------------------------------------------------------------------------------------------------------------------------------------------------------------------------------------------------------------------------------------------------------------------------------------------------------------------------------------------------------------------------------------------------------------------------------------------------|
| <b>TITLE (PROVISIONAL)</b> | A Novel Point-Of-Care Cytokine Biomarker Lateral Flow Test for the Screening for Sexually Transmitted Infections and Bacterial Vaginosis: Study Protocol of a Multi-Centre Multi-Disciplinary Prospective Observational Clinical Study to Evaluate the Performance and Feasibility of the Genital Inflammation Test (GIFT).                                                                                                                                                                                                                                                                     |
| <b>AUTHORS</b>             | RAMBOARINA, Stephanie; Crucitti, Tania; Gill, Katherine; Bekker, Linda Gail; Harding-Esch, Emma; van de Wijgert, Janneke H.H.M.; Huynh, Bich-Tram; Fortas, Camille; Harimanana, Aina; Mayouya Gamana, Théodora; Randremanana, Rindra Vatosoa; Mangahasimbola, Reziky; Dziva Chikwari, Chido; Kranzer, Katharina; Mackworth-Young, Constance; Bernays, Sarah; Thomas, Nicola; Anderson, David; Tanko, Fatime; Manhanzva, Monalisa; Lurie, Micaela; Khumalo, Fezile; Sinanovic, Edina; Honda, Ayako; Pidwell, Tanya; Francis, Suzanna; Masson, Lindi; Passmore, Jo-Anne; 'The Gift Study group, ' |

This article was not externally reviewed at BMJ Open. Protocols that have been independently assessed prior to submission to BMJ Open are usually fast-tracked to publication on the grounds that further substantial changes will not be possible. This independent assessment will usually be external, independent review for both a substantial grant award from a non-commercial or government funder and ethics approval.
