# Supplementary figures and images for: Novel point-of-care cytokine biomarker lateral flow test for the screening for sexually transmitted infections and bacterial vaginosis: study protocol of a multicentre multidisciplinary prospective observational clinical study to evaluate the performance and feasibility of the Genital InFlammation Test (GIFT)
Source: PubMed Central journal article supplement — BMJ Open. 2024 May 1;14(5):e084918. doi: 10.1136/bmjopen-2024-084918 (PMC11086546; doi:10.1136/bmjopen-2024-084918), 2024-05-01

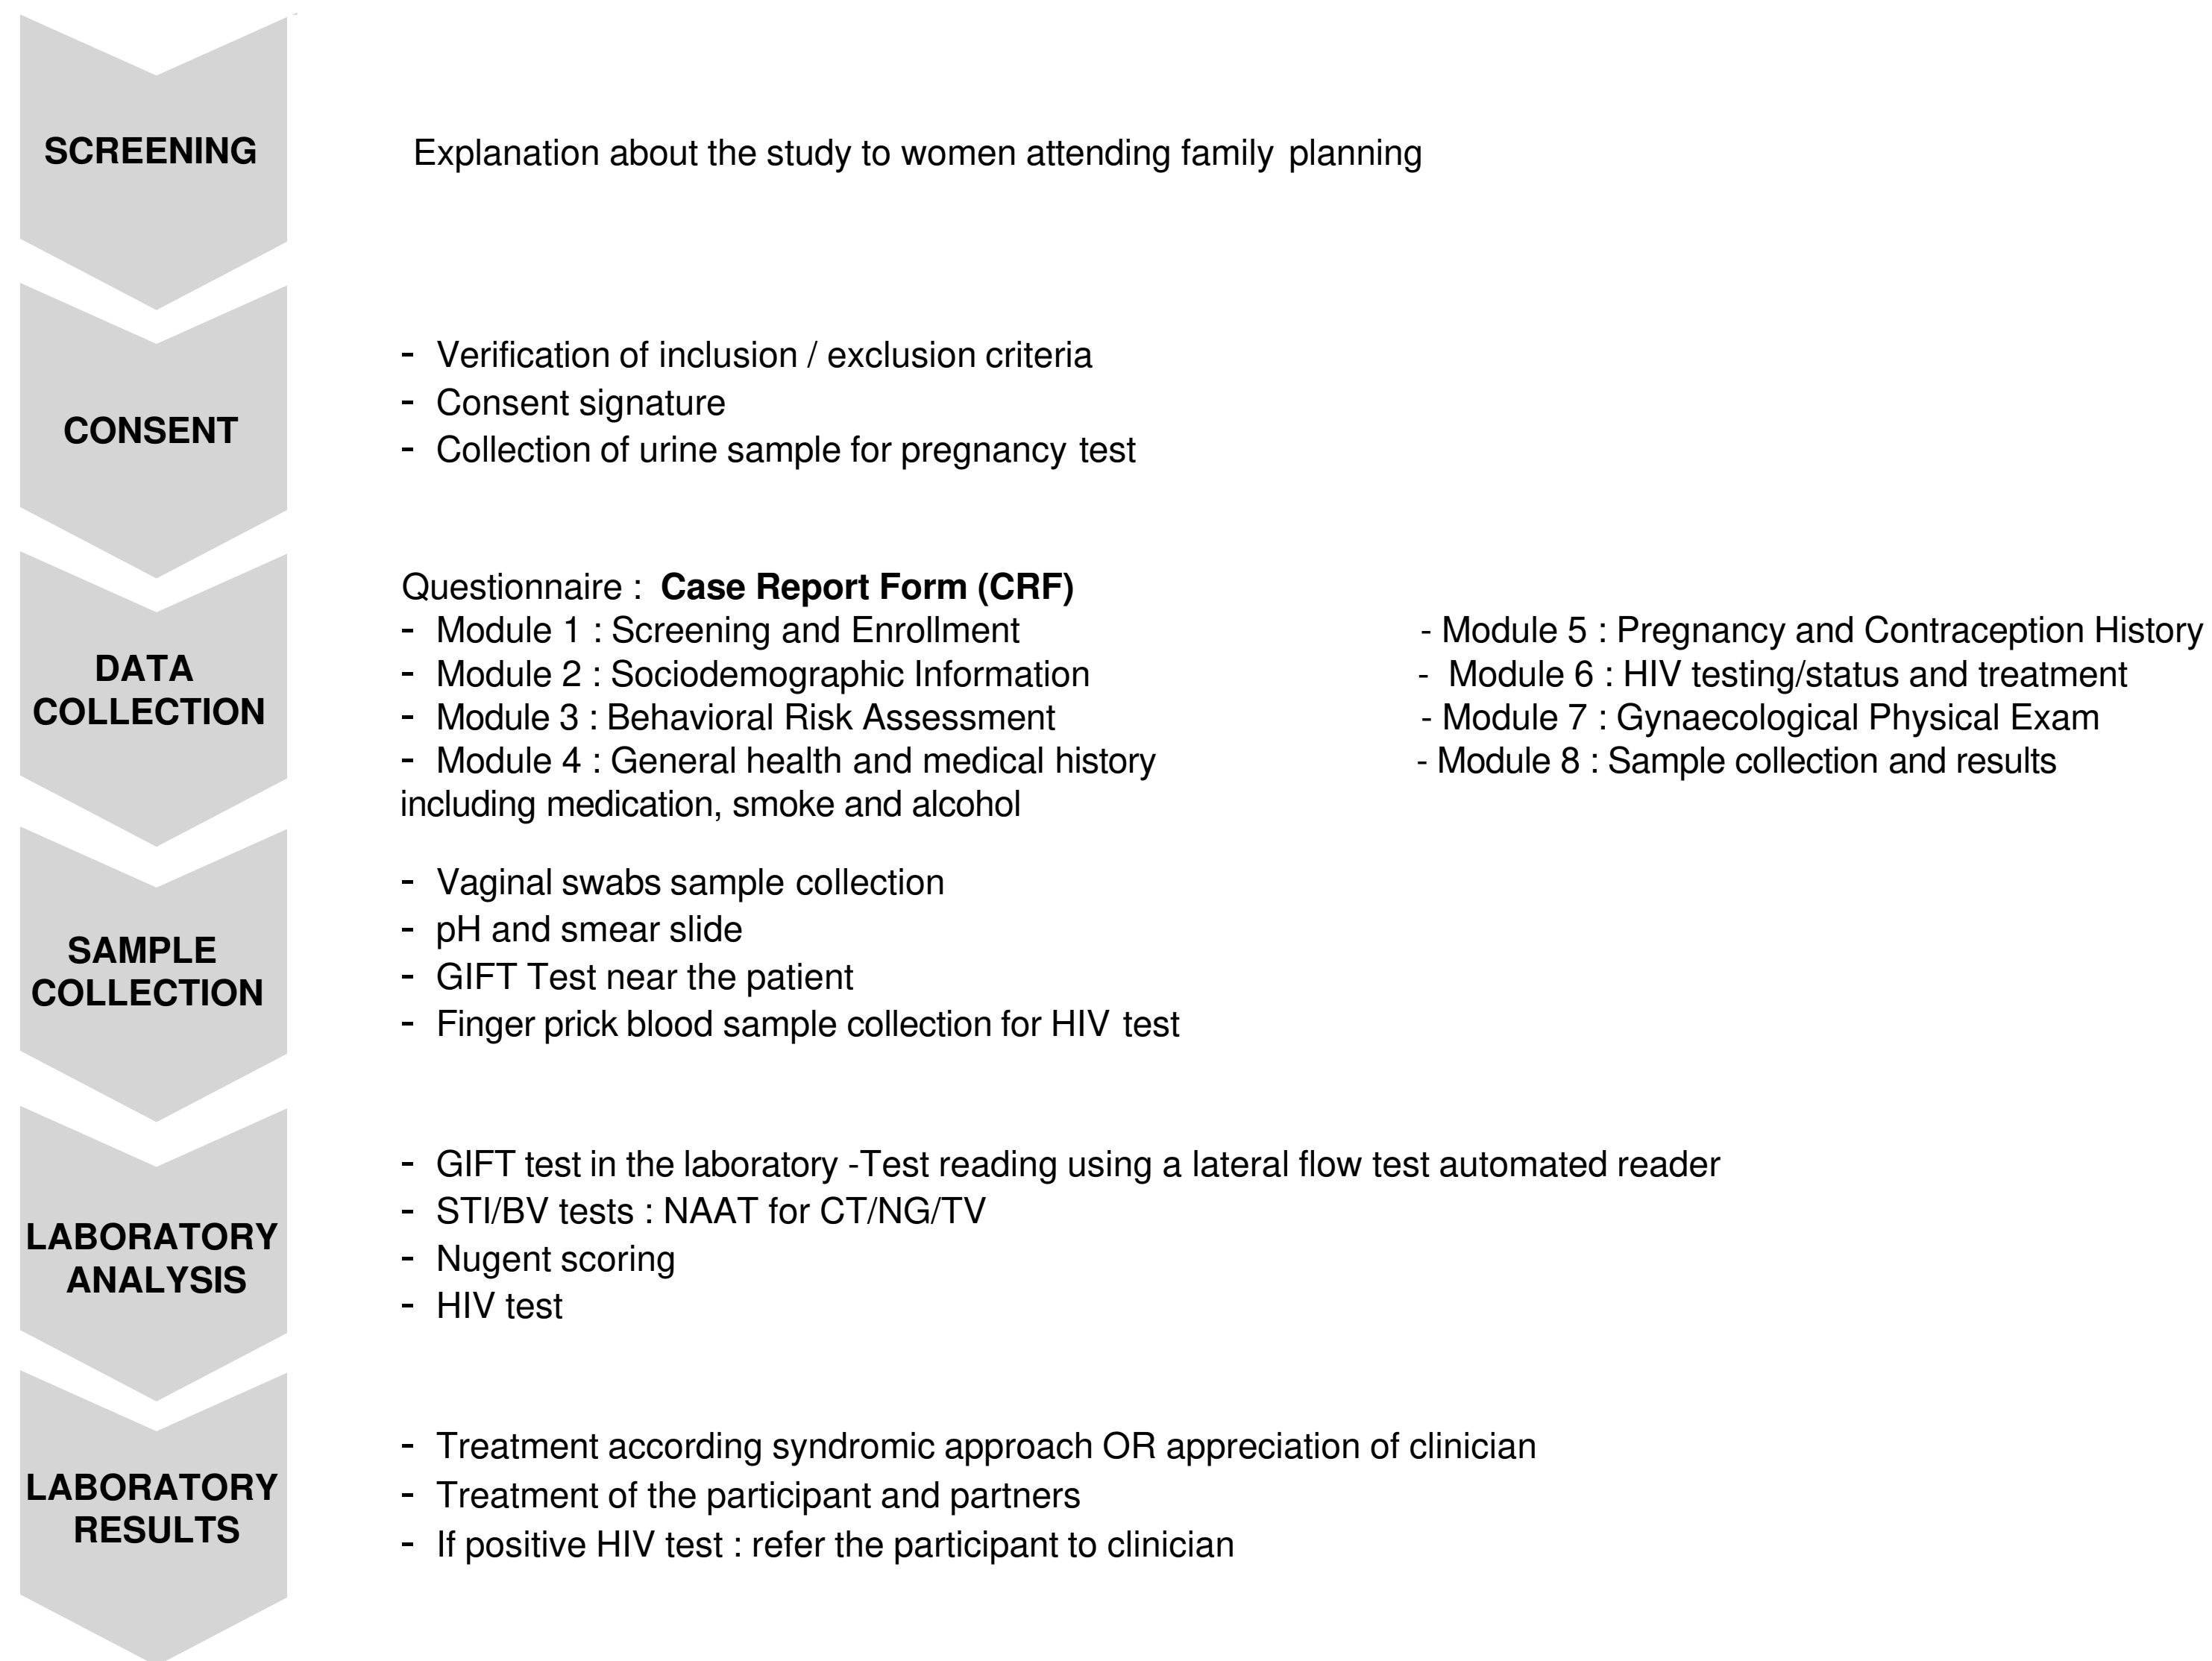

Supplement: bmjopen-2024-084918supp001.pdf [file bmjopen-2024-084918supp001.pdf]
